# Supplementary material
Source: HighWire-hosted journal article supplement (https://diabetes.diabetesjournals.org/content/suppl/2005/05/25/54.6.1863)
Supplement: Pg1863OnlineAppendix.pdf [file Pg1863OnlineAppendix.pdf]

Appendix: QTL effects fine-mapped on proximal chromosome 13 in the LGXSM Advanced Intercross Line (AIL) of mice. ‘a’ is the additive genotypic value (half the difference between homozygotes) and ‘d’ is the dominance genotypic value (difference between the heterozygote and midpoint of homozygotes).

| Trait                               | Position to nearest proximal marker | Position to centromere | Support Region | LOD  | a                       | SE(a)                  | Prob(a)                | D                       | SE(d)                  | Prob(d)                | % Var  |
|-------------------------------------|-------------------------------------|------------------------|----------------|------|-------------------------|------------------------|------------------------|-------------------------|------------------------|------------------------|--------|
| <b>Both Diets Analyzed Together</b> |                                     |                        |                |      |                         |                        |                        |                         |                        |                        |        |
| Heart weight                        | <i>D13Mit135+2</i>                  | 78                     | 62-86          | 2.35 | -3.47×10 <sup>-03</sup> | 1.61×10 <sup>-03</sup> | 0.0312                 | -5.86×10 <sup>-03</sup> | 2.33×10 <sup>-03</sup> | 0.0121                 | 0.3028 |
| Spleen weight                       | <i>D13Mit163</i>                    | 86                     | 80-86          | 2.06 | -8.98×10 <sup>-03</sup> | 4.01×10 <sup>-03</sup> | 0.0254                 | -0.0114                 | 5.70×10 <sup>-03</sup> | 0.0465                 | 0.0349 |
| 10 week AUC                         | <i>D13Mit134</i>                    | 42                     | 38-50          | 4.07 | -920                    | 290                    | 1.65×10 <sup>-03</sup> | 1159                    | 414                    | 5.35×10 <sup>-03</sup> | 0.258  |
| Post-weaning growth, females        | <i>D13Mit80+6</i>                   | 32                     | 12-50          | 2.22 | 7.34×10 <sup>-03</sup>  | 7.91×10 <sup>-03</sup> | 0.354                  | -0.041                  | 0.012                  | 6.62×10 <sup>-04</sup> | 0.127  |
| Post-weaning growth, males          | <i>D13Mit115+4</i>                  | 74                     | 68-86          | 2.39 | -0.0145                 | 6.33×10 <sup>-03</sup> | 0.0226                 | -0.0231                 | 8.87×10 <sup>-03</sup> | 9.34×10 <sup>-03</sup> | 0.198  |
| Inguinal fat pad, males             | <i>D13Mit115+4</i>                  | 74                     | 72-82          | 2.48 | -0.150                  | 0.0908                 | 0.0993                 | -0.388                  | 0.127                  | 2.40×10 <sup>-03</sup> | 0.219  |
| 20 week AUC, males                  | <i>D13Mit163</i>                    | 86                     | 66-86          | 2.11 | -1991                   | 656                    | 0.0027                 | 1039                    | 965                    | 0.282                  | 0.216  |
| <b>Low Fat Diet</b>                 |                                     |                        |                |      |                         |                        |                        |                         |                        |                        |        |
| Serum cholesterol                   | <i>D13Mit1+6</i>                    | 6                      | 0-18           | 3.07 | -4.03                   | 2.74                   | 0.141                  | -14.9                   | 4.08                   | 2.86×10 <sup>-04</sup> | 0.0542 |
| Heart weight                        | <i>D13Mit135+2</i>                  | 78                     | 66-86          | 2.50 | -3.72×10 <sup>-03</sup> | 2.26×10 <sup>-03</sup> | 0.101                  | -0.0100                 | 3.31×10 <sup>-03</sup> | 2.60×10 <sup>-03</sup> | 0.287  |
| Kidney weight                       | <i>D13Mit207+4</i>                  | 68                     | 60-78          | 2.89 | 2.23×10 <sup>-03</sup>  | 3.09×10 <sup>-03</sup> | 0.472                  | -0.0162                 | 4.47×10 <sup>-03</sup> | 3.33×10 <sup>-04</sup> | 0.606  |
| Post-weaning growth, females        | <i>D13Mit80+8</i>                   | 34                     | 28-48          | 4.04 | 8.50×10 <sup>-03</sup>  | 0.0106                 | 0.422                  | -0.0766                 | 0.0161                 | 3.40×10 <sup>-06</sup> | 0.0836 |
| Serum cholesterol, females          | <i>D13Mit302</i>                    | 24                     | 0-30           | 2.30 | 1.22                    | 3.46                   | 0.724                  | -16.8                   | 4.86                   | 6.30×10 <sup>-04</sup> | 0.0458 |
| 20 week basal glucose, females      | <i>D13Mit115+4</i>                  | 74                     | 72-86          | 2.93 | 12.5                    | 3.43                   | 4.00×10 <sup>-04</sup> | -3.43                   | 5.12                   | 0.505                  | 0.110  |

|                                                |              |    |       |      |                         |        |                        |                         |                        |                        |                        |
|------------------------------------------------|--------------|----|-------|------|-------------------------|--------|------------------------|-------------------------|------------------------|------------------------|------------------------|
| Reproductive fat pad to body ratio, females    | D13Mit134+2  | 44 | 32-56 | 2.32 | -8.21×10 <sup>-03</sup> | 0.0198 | 0.679                  | -0.0955                 | 0.0294                 | 1.30×10 <sup>-03</sup> | 0.0414                 |
| Pre-weaning growth, males                      | D13Mit1+14   | 14 | 0-42  | 2.22 | 0.0397                  | 0.0133 | 3.08×10 <sup>-03</sup> | 0.0232                  | 0.0196                 | 0.236                  | 0.0421                 |
| Liver weight, males                            | D13Mit1+8    | 8  | 0-32  | 2.20 | 0.0763                  | 0.0334 | 0.0231                 | -0.113                  | 0.0491                 | 0.0224                 | 0.0409                 |
| Serum insulin, males                           | D13Mit1+14   | 14 | 0-38  | 2.63 | 1.03                    | 0.322  | 1.49×10 <sup>-03</sup> | -0.754                  | 0.476                  | 0.115                  | 0.0495                 |
| Renal fat pad weight, males                    | D13Mit1+22   | 22 | 14-36 | 3.59 | 0.169                   | 0.0432 | 1.20×10 <sup>-04</sup> | -0.0671                 | 0.0604                 | 0.2686                 | 0.0622                 |
| <b>High Fat Diet</b>                           |              |    |       |      |                         |        |                        |                         |                        |                        |                        |
| Mesenteric fat pad to body ratio, females      | D13Mit163    | 86 | 82-86 | 2.08 | -0.0170                 | 0.0136 | 0.215                  | -0.0531                 | 0.0189                 | 5.36×10 <sup>-03</sup> | 0.0377                 |
| Serum triglycerides, males                     | D13Mit163    | 86 | 80-86 | 2.40 | 17.4                    | 5.90   | 3.42×10 <sup>-03</sup> | 11.8                    | 8.37                   | 0.160                  | 0.0443                 |
| Liver weight, males                            | D13Mit80     | 26 | 0-36  | 2.30 | -0.208                  | 0.0727 | 4.67×10 <sup>-03</sup> | 0.168                   | 0.104                  | 0.106                  | 0.0412                 |
| 20 week AUC, males                             | D13Mit163    | 86 | 76-86 | 2.64 | -3951                   | 1111   | 5.70×10 <sup>-04</sup> | 1581                    | 1623                   | 0.332                  | 0.107                  |
| <b>Diet by Gene Interactions</b>               |              |    |       |      |                         |        |                        |                         |                        |                        |                        |
| Reproductive fat pad weight                    | D13Mit1+22   | 22 | 8-40  | 2.34 | -0.233                  | 0.112  | 0.0381                 | 0.483                   | 0.158                  | 2.33×10 <sup>-03</sup> | 0.233                  |
| Liver weight, females                          | D13Mit134+8  | 50 | 34-70 | 2.18 | 0.0198                  | 4.46   | 0.717                  | 0.232                   | 7.46×10 <sup>-03</sup> | 8.27×10 <sup>-03</sup> | 0.384                  |
| Mesenteric fat pad to total fat ratio, females | D13Mit134+18 | 60 | 48-74 | 2.26 | -0.0121                 | 0.830  | 0.315                  | -0.0327                 | 6.67×10 <sup>-03</sup> | 0.0708                 | 0.139                  |
| Pre-weaning growth, males                      | D13Mit1+12   | 12 | 0-38  | 2.56 | -7.52×10 <sup>-03</sup> | 1.27   | 0.543                  | -9.09×10 <sup>-03</sup> | 0.0150                 | 0.618                  | 1.43×10 <sup>-03</sup> |
| Serum triglycerides, males                     | D13Mit163    | 86 | 76-86 | 2.15 | 17.4                    | 26.3   | 4.66×10 <sup>-04</sup> | 11.8                    | 10.4                   | 0.0933                 | 0.0497                 |

|                         |            |    |      |      |        |       |                        |       |       |       |       |
|-------------------------|------------|----|------|------|--------|-------|------------------------|-------|-------|-------|-------|
| Serum insulin,<br>males | D13Mit1+12 | 12 | 2-50 | 3.51 | -1.61  | 1.42  | $1.17 \times 10^{-03}$ | 0.812 | 1.44  | 0.266 | 0.209 |
| Liver weight,<br>males  | D13Mit1+16 | 16 | 2-32 | 3.50 | -0.241 | 0.528 | $1.16 \times 10^{-04}$ | 0.148 | 0.150 | 0.108 | 0.463 |
